# Supplementary material for: A Novel Cold-Adapted and High-Alkaline Alginate Lyase with Potential for Alginate Oligosaccharides Preparation
Source: MDPI journal article supplement (doi:10.3390/molecules28176190), 2023-08-22
Supplement: s1 [file s1]

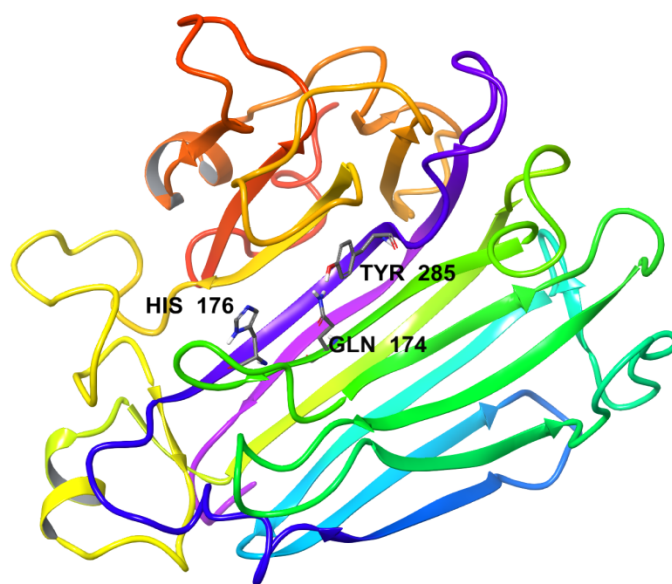

**Figure S1.** 3D structure of Alyw208 by homology modeling. Three predicted catalytic residues (Q174, H176, and Y285) are shown.

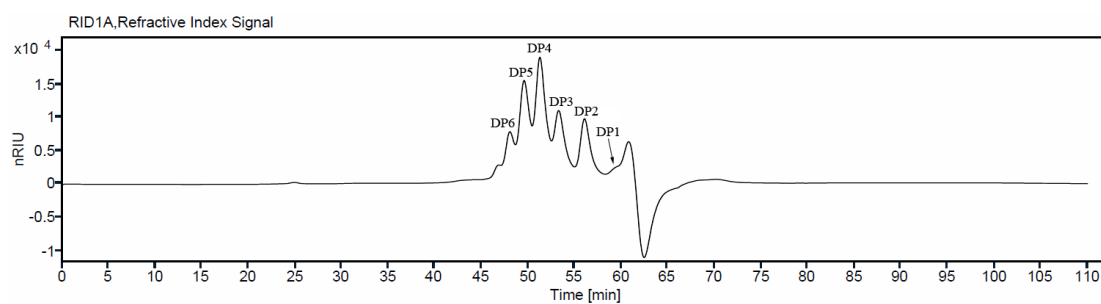

**Figure S2.** SEC analysis of the degradation products. Alginate monomer (DP1) and AOs with DPs 2-6 were the main products derived from enzymatic degradation of 2% sodium alginate by recombinant alginate lyase Alyw208.

**Table S1.** The proportions of AOs with different DPs in the final degradation product.

| DP | Retention time (min) | Mass fraction (%) |
|----|----------------------|-------------------|
| 2  | 56.053               | 16.47             |
| 3  | 53.280               | 18.11             |
| 4  | 51.266               | 28.62             |
| 5  | 49.577               | 21.91             |
| 6  | 48.050               | 9.75              |
| >6 | 46.866               | 5.14              |
